# Supplementary material for: Flexible Neural Electrode Array Based-on Porous Graphene for Cortical Microstimulation and Sensing
Source: Springer Nature journal article supplement (doi:10.1038/srep33526), 2016-09-19
Supplement: 41598_2016_BFsrep33526_MOESM1_ESM.pdf [file 41598_2016_BFsrep33526_MOESM1_ESM.pdf]

## Flexible Neural Electrode Array Based-on Porous Graphene for Cortical Microstimulation and Sensing

Yichen Lu<sup>†</sup>, Hongming Lyu<sup>†</sup>, Andrew G. Richardson, Timothy H. Lucas, and Duygu Kuzum\*

Yichen Lu and Hongming Lyu contribute equally to this paper.

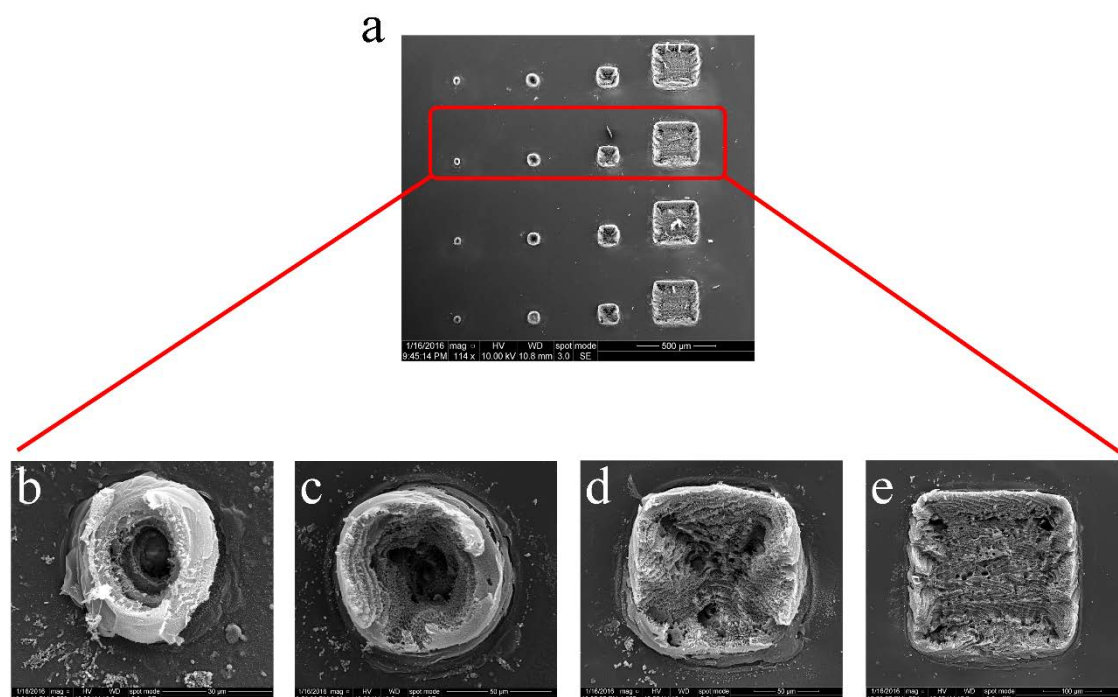

**Figure S1.** SEM of porous graphene spots printed through shadow masks. a) Overall view of a porous graphene array of spots with difference sizes. b-e) present spots with 25  $\mu\text{m}$ , 50  $\mu\text{m}$ , 100  $\mu\text{m}$  and 250  $\mu\text{m}$  side lengths, respectively. Shadow mask method of laser printing ensures good shape control on spots with sides larger than 100  $\mu\text{m}$ . For 25  $\mu\text{m}$  and 50  $\mu\text{m}$  spots, further shadow mask engineering is needed for better uniformity.

## Sample #2

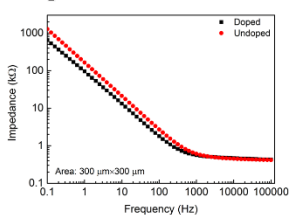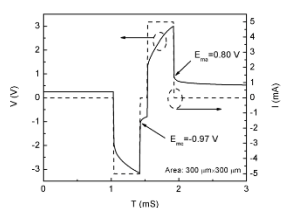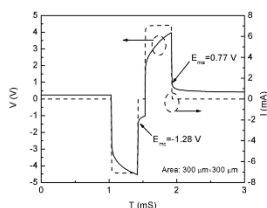

## Sample #3

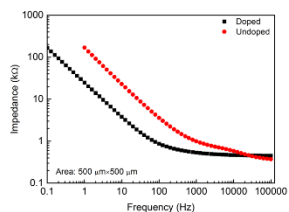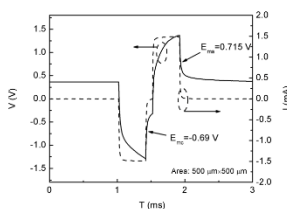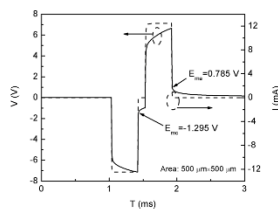

## Sample #4

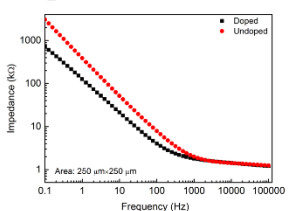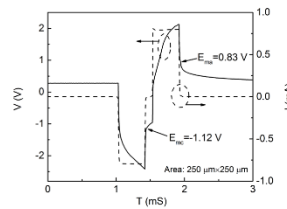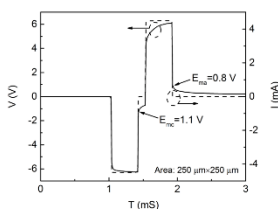

## Sample #5

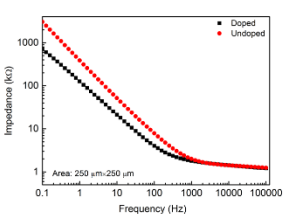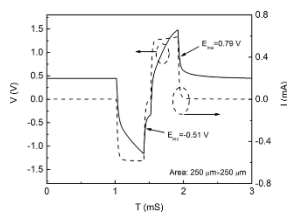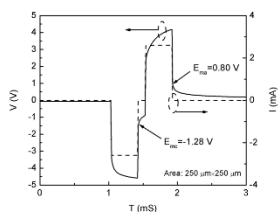

**Figure S2.** Electrochemistry characterization results of more typical porous graphene electrodes. The first, second, third and fourth rows are sample #2, sample #3, sample #4 and sample #5, respectively. The first, second, and third columns are the EIS results, voltage transients in response to applied current pulses before and after doping, respectively.

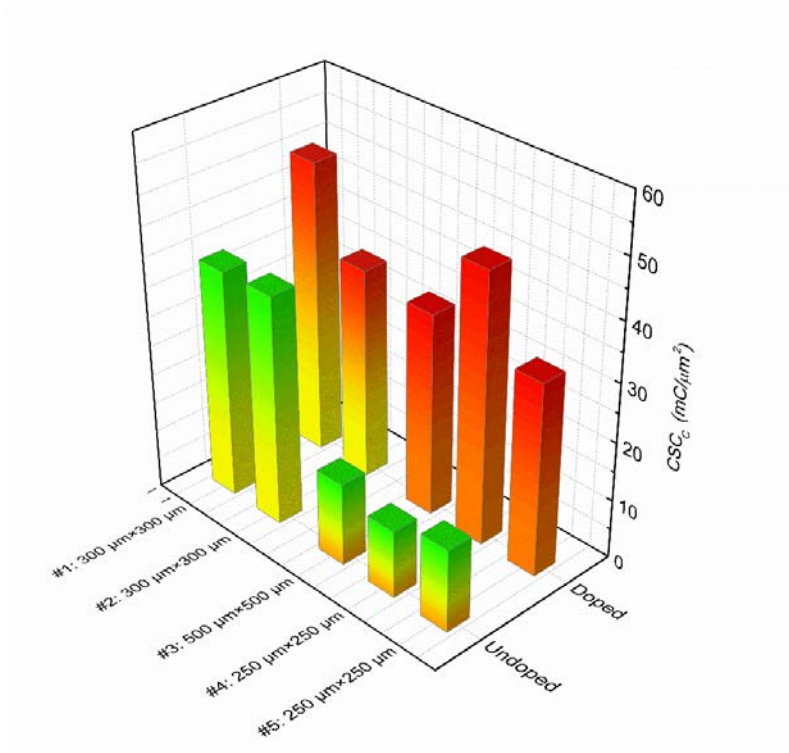

**Figure S3.** Cathodic charge storage capacity of five representative porous graphene electrodes.

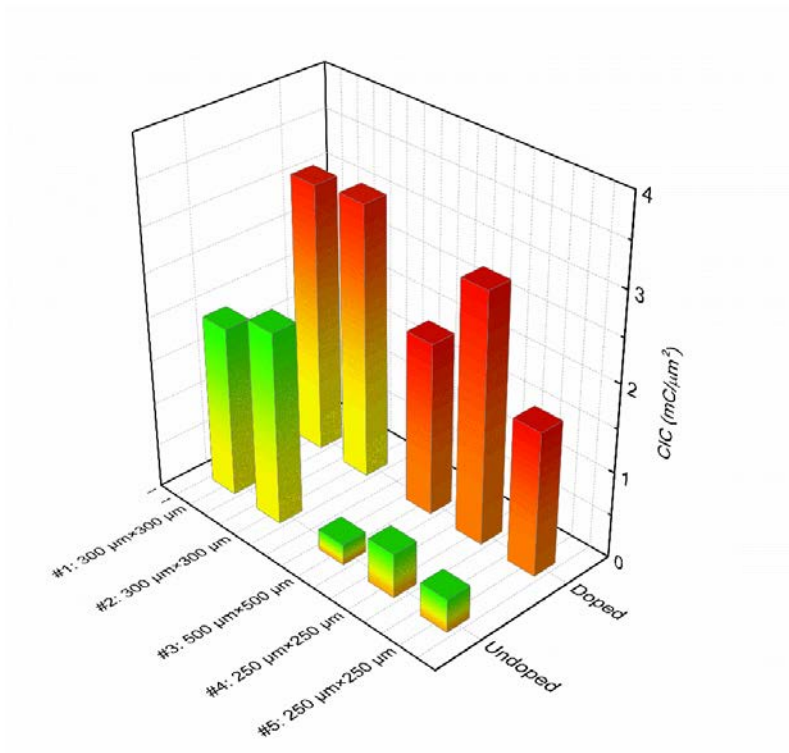

**Figure S4.** Charge Injection capacity of five representative porous graphene electrodes.

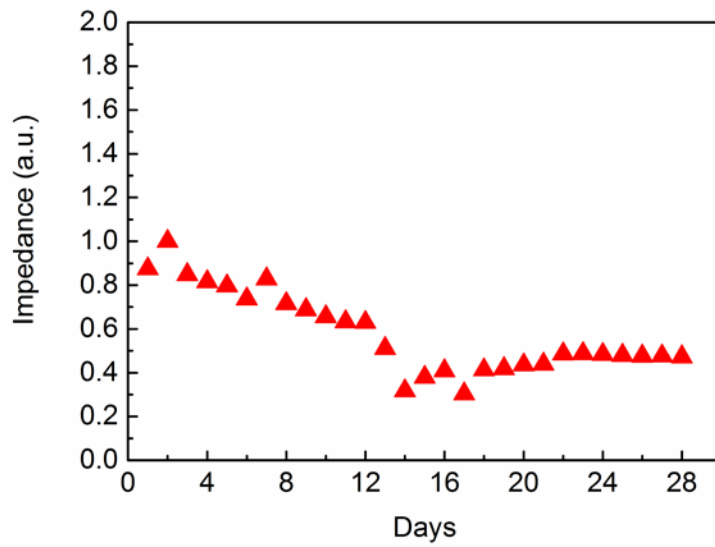

**Figure S5.** Longevity of doping treatment's impact on impedance over 28 days.

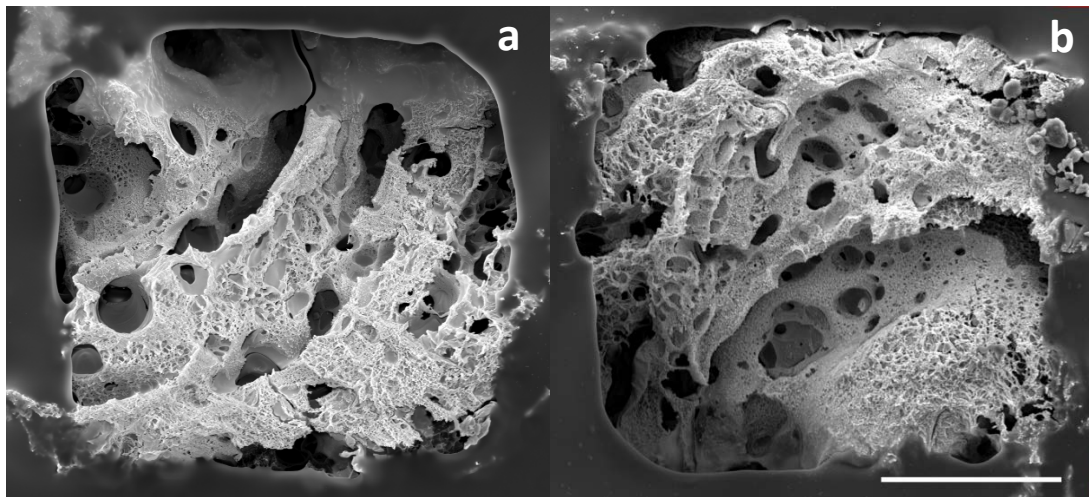

**Figure S6.** (a) SEM of an unused electrode; (b) SEM image of an porous graphene electrode after using in the animal experiment and soaking in PBS solution for a month. Scale bar: 40  $\mu\text{m}$

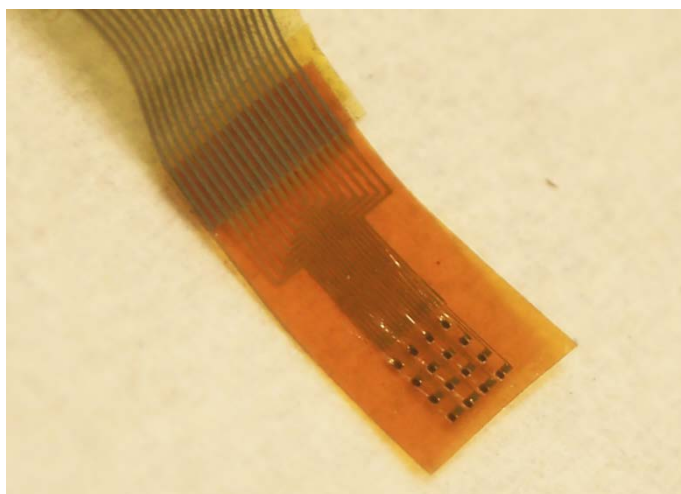

**Figure S7.** Photograph of a 16-electrode array.

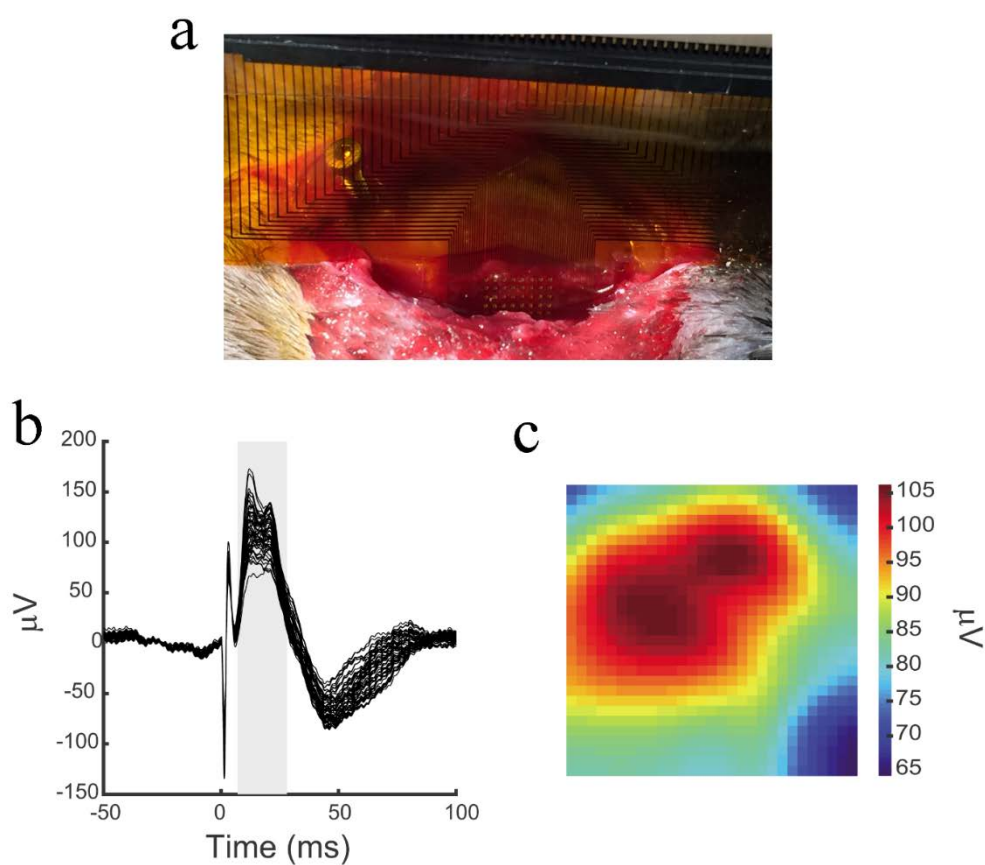

**Figure S8.** Evoked potential recording with a 64-electrode array. A pair of needle stimulating electrodes were used to electrically stimulate the mystacial pad of a rat model. a) Placement on the pial surface of barrel cortex. b) Recorded evoked potentials. c) The amplitude of the first positive peak of the evoked potentials.

**Table S1.** Comparison of state-of-art neural electrodes.

| Material                          | Water Window versus Ag/AgCl | CIC (mC/cm <sup>2</sup> ) | CSC (mC/cm <sup>2</sup> ) | Ref    |
|-----------------------------------|-----------------------------|---------------------------|---------------------------|--------|
| Prlr                              | -0.6 V to 0.8 V             | 0.15-0.3                  |                           | [1]    |
| Pt                                | -0.6 V to 0.8 V             | 0.05-0.15                 | 0.55 @20mV/s              | [2, 4] |
| TiN                               | -0.9 V to 0.9 V             | 0.9                       | 0.25 @20mV/s              | [3, 4] |
| Iridium Oxide                     | -0.6 V to 0.8 V             | 2                         | 28.8 @ 50 mV/s            | [5, 7] |
| PEDOT                             | -0.7 to 0.6 V               | 2.3                       | 75.6 @ 50 mV/s            | [6, 7] |
| Ta/Ta <sub>2</sub> O <sub>5</sub> |                             | 0.26                      |                           | [8]    |
| Carbon Nanotube Fiber             | -1.5 V to 1.0 V             | 1-1.6                     |                           | [9]    |
| Carbon Nanotube Coating           | -0.9 V to 0.5 V             |                           | 5~25 @100 mV/s            | [10]   |
| This Work                         | -1.3 V to 0.8 V             | 3.2                       | 50 @100 mV/s              |        |

### Supplementary Video Legends

**Video S1:** Video shows that cortical stimulation with current amplitude of 1.25 mA induces ankle and knee flexion. Beep sound represents the timing of stimulation using porous graphene electrodes.

**Video S2:** Video shows that cortical stimulation with current amplitude of 0.5 mA does not evoke leg movement.

### References

- [1] L. Bullara, D. McCreery, T. Yuen, W. Agnew, *Journal of Neuroscience Methods* 1983, 9, 15.
- [2] T. Rose, L. Robblee, *Biomedical Engineering, IEEE Transactions on* 1990, 37, 1118.
- [3] J. D. Weiland, D. J. Anderson, M. S. Humayun, *Biomedical Engineering, IEEE Transactions on* 2002, 49, 1574.
- [4] S. F. Cogan, *Annu. Rev. Biomed. Eng.* 2008, 10, 275.
- [5] S. F. Cogan, A. A. Guzelian, W. F. Agnew, T. G. Yuen, D. B. McCreery, *Journal of Neuroscience Methods* 2004, 137, 141.
- [6] X. T. Cui, D. D. Zhou, *Neural Systems and Rehabilitation Engineering, IEEE Transactions on* 2007, 15, 502.
- [7] S. J. Wilks, S. M. Richardson-Burns, J. L. Hendricks, D. C. Martin, K. J. Otto, *Frontiers in Neuroengineering* 2009, 2, 7.
- [8] T. Rose, E. Kelliher, L. Robblee, *Journal of Neuroscience Methods* 1985, 12, 181.
- [9] K. Wang, H. A. Fishman, H. Dai, J. S. Harris, *Nano Letters* 2006, 6, 2043.
- [10] E. Jan, J. L. Hendricks, V. Husaini, S. M. Richardson-Burns, A. Sereno, D. C. Martin, N. A. Kotov, *Nano Letters* 2009, 9, 4012.
